# Supplementary material for: Distribution and Diversity of Beauveria in Boreal Forests of Northern European Russia
Source: MDPI journal article supplement (doi:10.3390/microorganisms9071409), 2021-06-29

Figure S3. Percent of agricultural lands in each federal subject of Russian Federation. Data obtained from Analytical Center of the Russian Ministry of Agriculture (<http://mcxac.ru/>)

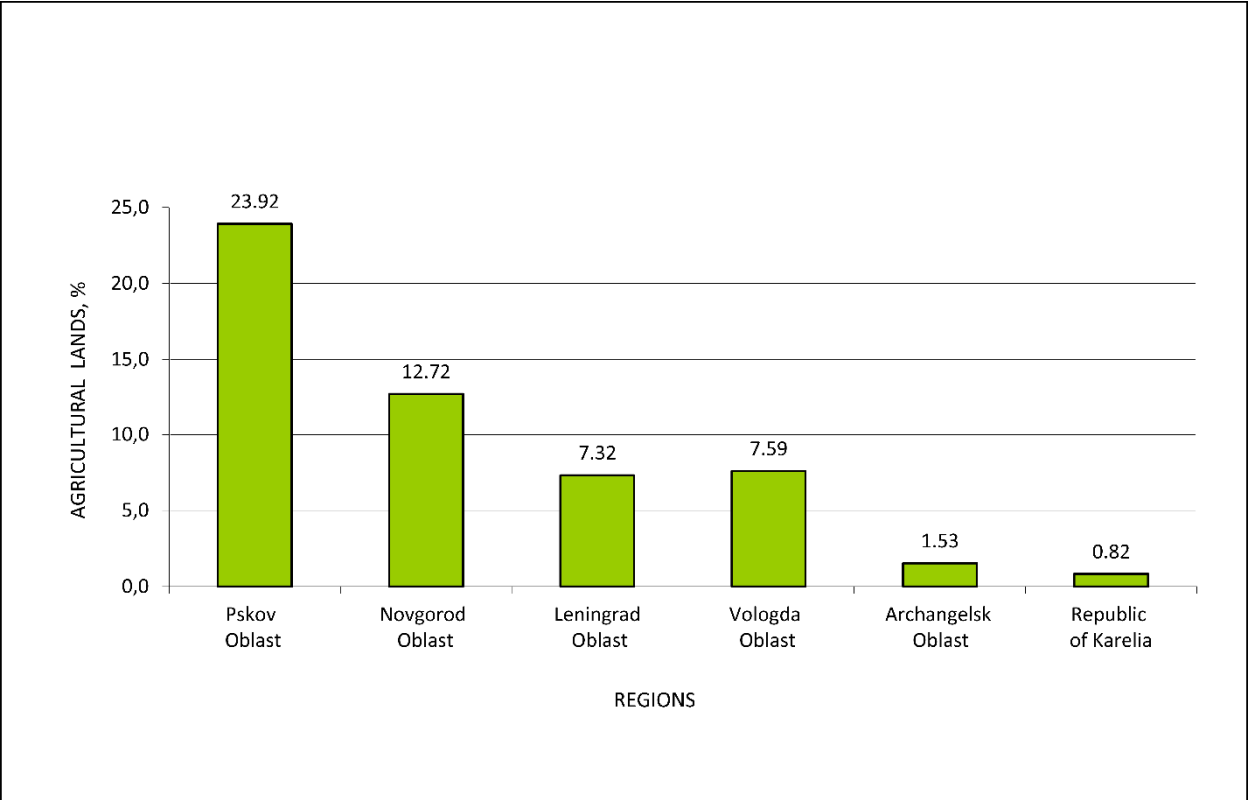

Supplement: s1 [file s1]
