# Supplementary material for: Distribution and Diversity of Beauveria in Boreal Forests of Northern European Russia
Source: MDPI journal article supplement (doi:10.3390/microorganisms9071409), 2021-06-29
Supplement: s1 [file s1]

Table S3. Haplotype polymorphism and recombination of *Beauveria* species

| Parameter                               | dfb <sup>1</sup> | dfc             | NER             |
|-----------------------------------------|------------------|-----------------|-----------------|
| <i>B. pseudobassiana</i>                |                  |                 |                 |
| Number of isolates                      | 17               | 57              | 74              |
| Number of TEF alleles                   | 3                | 3               | 4               |
| TEF allelic diversity (SD) <sup>2</sup> | 0.662(0.065)     | 0.628(0.034)    | 0.638(0.033)    |
| Number of Bloc alleles                  | 4                | 8               | 9               |
| Bloc allelic diversity (SD)             | 0.566(0.123)     | 0.781(0.044)    | 0.738(0.045)    |
| Number of MLS haplotypes                | 5                | 10              | 12              |
| MLS allelic diversity (SD)              | 0.787(0.059)     | 0.872(0.02)     | 0.863(0.022)    |
| Phylogenetic diversity                  | 0.0155           | 0.0288          | 0.0326          |
| PHI <sup>3</sup> test                   | 1.0              | 0.010           | 0.007           |
| IAs <sup>4</sup> NCC (p-value)          | 0.2928(0.00692)  | 0.2290(0.00007) | 0.1970(0.00005) |
| IAs CC (p-value)                        | -0.0667(1)       | -0.0874(1)      | -0.0860(0.598)  |
| <i>B. bassiana</i>                      |                  |                 |                 |
| Number of isolates                      | 8                | 2               | 10              |
| Number of TEF alleles                   | 3                | 2               | 4               |
| TEF allelic diversity (SD)              | 0.75(0.096)      | 1(0.5)          | 0,778 (0,091)   |
| Number of Bloc alleles                  | 3                | 2               | 4               |
| Bloc allelic diversity (SD)             | 0.75(0.096)      | 1(0.5)          | 0,778(0.091)    |
| Number of MLS haplotypes                | 3                | 2               | 4               |
| MLS allelic diversity (SD)              | 0.75(0.096)      | 1(0.5)          | 0,778(0.091)    |
| Phylogenetic diversity                  | 0.0495           | 0.0064          | 0.0537          |
| PHI test                                | 1.0              | n/p             | 0.025           |
| IAs NCC (p-value)                       | 1.0741(0.0035)   | n/p             | 1.0455(0.00003) |
| IAs CC (p-value)                        | n/p              | n/p             | n/p             |
| <i>B. caledonica</i>                    |                  |                 |                 |
| Number of isolates                      | 6                | 1               | 7               |
| Number of TEF alleles                   | 1                | 1               | 1               |
| TEF allelic diversity (SD)              | 0 (0)            | n/p             | 0(0)            |
| Number of Bloc alleles                  | 1                | 1               | 2               |
| Bloc allelic diversity (SD)             | 0 (0)            | n/p             | 0.286(0.196)    |
| Number of MLS haplotypes                | 1                | 1               | 2               |
| MLS allelic diversity (SD)              | 0 (0)            | n/p             | 0.286(0.196)    |
| Phylogenetic diversity                  | 0                | 0               | 0.0011          |
| PHI test                                | n/p              | n/p             | n/p             |
| IAs for NCC/CC (p-value)                | n/p              | n/p             | n/p             |

<sup>1</sup> Abbreviations: dfb, warm-summer humid continental climate zone; dfc, subarctic climate zone; NER, northern European Russia; NCC, non-clone-corrected data; CC, clone corrected data; n/p, not possible: calculation not done because of insufficiently large dataset;

<sup>2</sup> Allelic (haplotype) diversity (Hd) and standard deviation (SD) were calculated for TEF, Bloc and multilocus data (MLS) with DNAsp (Librado, Rozas, 2009);

<sup>3</sup> PHI ( $\Phi_w$ , pairwise homoplasy index) test (Bruen et al., 2006) was calculated with SplitsTree 4 software (Huson, Bryant, 2006);

<sup>4</sup> Indexes of association (IAs) for non-clone-corrected and clone corrected data were calculated with LIAN 3.5 (Haubold, Hudson, 2000);
