# Supplementary material for: Distribution and Diversity of Beauveria in Boreal Forests of Northern European Russia
Source: MDPI journal article supplement (doi:10.3390/microorganisms9071409), 2021-06-29
Supplement: s1 [file s1]

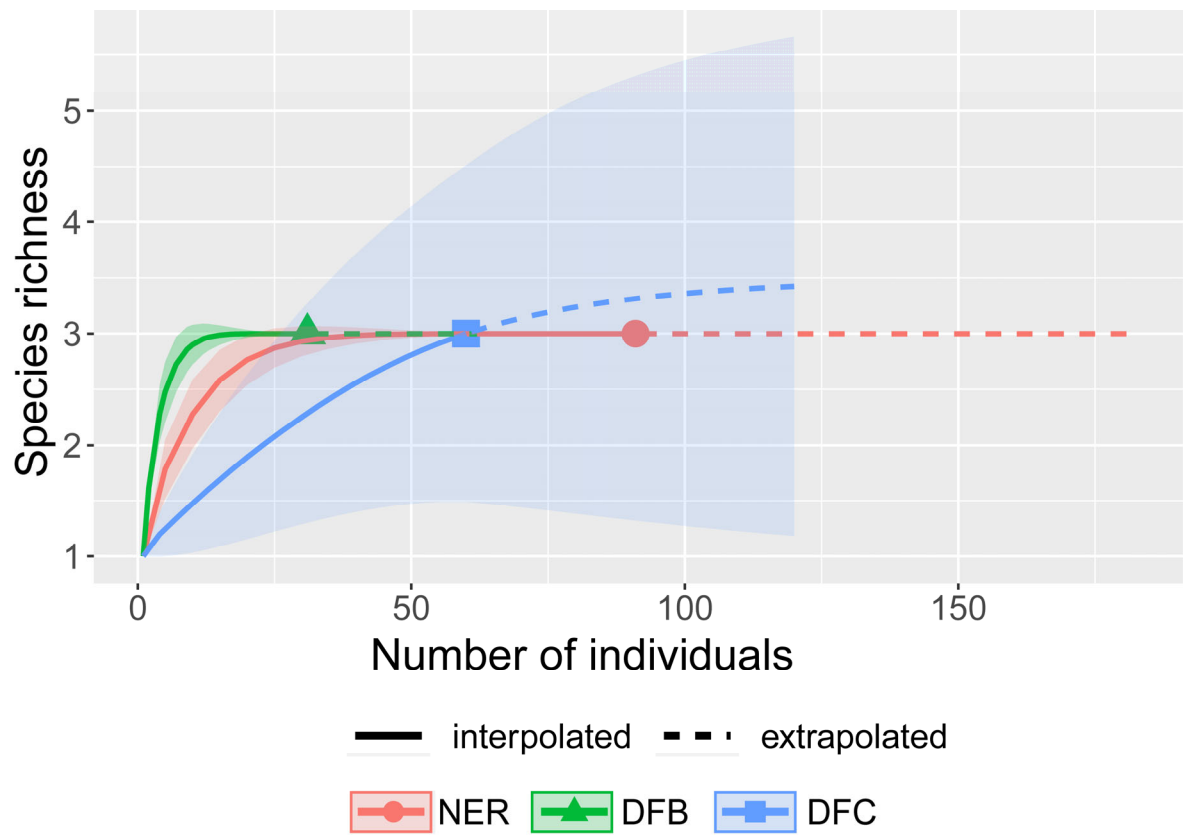

Figure S1. Rarefaction curves for total *Beauveria* species richness observed in Northern European Russia (NER) area and southern (dfb) and northern (dfc) subareas. Rarefaction curves for *B. bassiana* and *B. caledonica* were not obtained due to insufficient data. Transparent areas on plots corresponds to 95% confidence intervals.
