# Supplementary material for: Distribution and Diversity of Beauveria in Boreal Forests of Northern European Russia
Source: Microorganisms. 2021 Jun 29;9(7):1409. doi: 10.3390/microorganisms9071409 (PMC8308049; doi:10.3390/microorganisms9071409)
Supplement: Supplementary file 1 [file microorganisms-09-01409-s001.zip]

Archive with 7 entries (7 files):
- Figure_S1_Rarefaction_curves_for_Beauveria_spp..pdf
- Figure_S2_MLS phylogenetic tree of Beauveria spp..pdf
- Figure_S3_Percent_of_agricultural_lands.pdf
- Table_S1_Beauveria_isolates_info .xlsx
- Table_S2_Accompanying_species.xlsx
- Table_S3_Haplotype polymorphism and recombination .pdf
- Table_S4_Spatial autocorrelation.xlsx
