# Supplementary material for: Distribution and Diversity of Beauveria in Boreal Forests of Northern European Russia
Source: Microorganisms. 2021 Jun 29;9(7):1409. doi: 10.3390/microorganisms9071409 (PMC8308049; doi:10.3390/microorganisms9071409)
Supplement: Supplementary file 1 [file microorganisms-09-01409-s001.zip › Table_S1_Beauveria_isolates_info .xlsx]

## Sheet: S1_Beauveria_isolates_info.
Table S1. Beauveria spp. isolates used in this study, their origin, host, haplotypes and GenBank numbers
№ location	isolates	species	host	administrative location	haplotypes	year	Lat	Lon	GenBank Accession Number
									TEF1a	Bloc
1	BCo27Ps13	B.bassiana	Coleoptera	Pskov Oblast, Opochetsky District	bT1B1	2013	56.65363	28.59866	MN706319	MN706379
2	BD62Ps13	B.bassiana	Diptera	Pskov Oblast, Porkhovsky District	bT1B1	2013	57.688164	29.605172	MN706320	MN706380
3	BIn622Ng18	B.bassiana	Insecta	Novgorod Oblast, Poddorsky District	bT3B3	2018	57.645617	31.233983	MN706321	MN706381
	PIn64Ng18	B.bassiana	Insecta	Novgorod Oblast, Poddorsky District	bT3B3	2018	57.645617	31.233983	MN706322	MN706382
4	BAp614Ng18	B.bassiana	Hymenoptera, Apocryta	Novgorod Oblast, Starorussky District	bT1B1	2018	57.706867	31.876067	MN706318	MN706378
5	PLe315Ng18	B.pseudobassiana	Lepidoptera (pupa)	Novgorod Oblast, Okulovsky District, Valdaysky National Park	pT1B1.2	2018	57.742183	32.993883	MN706294	MN706354
6	BSc81Ps18	B.pseudobassiana	Coleoptera, Curculionidae, Scolytinae	Pskov Oblast, Porkhovsky District	pT4B3	2018	57.99025	29.82645	MN706305	MN706365
	BSc89Ps18	B.pseudobassiana	Coleoptera, Curculionidae, Scolytinae	Pskov Oblast, Porkhovsky District	pT4B3	2018	57.99025	29.82645	MN706306	MN706366
	BSc831Ps18	B.pseudobassiana	Coleoptera, Curculionidae, Scolytinae	Pskov Oblast, Porkhovsky District	pT4B3	2018	57.99025	29.82645	MN706307	MN706367
7	BSc75Ng18	B.bassiana	Coleoptera, Curculionidae, Scolytinae	Novgorod Oblast, Soletsky District	bT2B2	2018	58.173583	30.506583	MN706317	MN706377
	BSc76Ng18	B.bassiana	Coleoptera, Curculionidae, Scolytinae	Novgorod Oblast, Soletsky District	bT2B2	2018	58.173583	30.506583	MN706316	MN706376
8	BSc212Vg18	B.caledonica	Coleoptera, Curculionidae, Scolytinae	Vologda Oblast, Cherepovetsky District, Darwin Nature Reserve	cT1B1	2018	58.527467	37.557617	MN706313	MN706373
	BSc214Vg18	B.caledonica	Coleoptera, Curculionidae, Scolytinae	Vologda Oblast, Cherepovetsky District, Darwin Nature Reserve	cT1B1	2018	58.527467	37.557617	MN706311	MN706371
	BSc215Vg18	B.caledonica	Coleoptera, Curculionidae, Scolytinae	Vologda Oblast, Cherepovetsky District, Darwin Nature Reserve	cT1B1	2018	58.527467	37.557617	MN706314	MN706374
	BSc25Vg18	B.caledonica	Coleoptera, Curculionidae, Scolytinae	Vologda Oblast, Cherepovetsky District, Darwin Nature Reserve	cT1B1	2018	58.527467	37.557617	MN706309	MN706369
	BCo22Vg18	B.pseudobassiana	Coleoptera, Cantharidae	Vologda Oblast, Cherepovetsky District, Darwin Nature Reserve	pT1B1.2	2018	58.527467	37.557617	MN706293	MN706353
	PLe27Vg18	B.pseudobassiana	Lepidoptera (pupa)	Vologda Oblast, Cherepovetsky District, Darwin Nature Reserve	pT2B1.1	2018	58.527467	37.557617	MN706271	MN706331
9	BSc12Vg18	B.caledonica	Coleoptera, Curculionidae, Scolytinae	Vologda Oblast, Ustyuzhensky District	cT1B1	2018	58.977717	36.5747	MN706312	MN706372
	BSc13Vg18	B.caledonica	Coleoptera, Curculionidae, Scolytinae	Vologda Oblast, Ustyuzhensky District	cT1B1	2018	58.977717	36.5747	MN706310	MN706370
10	BIt352Lo17	B.pseudobassiana	Coleoptera, Curculionidae, Scolytinae, Ips typographus	Leningrad Oblast, Luzhsky District	pT1B1.1	2017	58.634142	29.848023	MN706292	MN706352
11	BHe1001Ps18	B.pseudobassiana	Hemiptera	Pskov Oblast, Gdovsky District	pT1B1.1	2018	58.928083	27.942017	MN706296	MN706356
	BSc92Ps18	B.pseudobassiana	Coleoptera, Curculionidae, Scolytinae	Pskov Oblast, Gdovsky District	pT2B1.1	2018	58.928083	27.942017	MN706272	MN706332
12	BIt1112Ps18	B.bassiana	Coleoptera, Curculionidae, Scolytinae, Ips typographus	Pskov Oblast, Gdovsky District	bT2B2	2018	58.979183	28.009717	MN706315	MN706375
	BIt1101Ps18	B.pseudobassiana	Coleoptera, Curculionidae, Scolytinae, Ips typographus	Pskov Oblast, Gdovsky District	pT1B1.1	2018	58.979183	28.009717	MN706295	MN706355
	BIt1104Ps18	B.pseudobassiana	Coleoptera, Curculionidae, Scolytinae, Ips typographus	Pskov Oblast, Gdovsky District	pT1B1.1	2018	58.979183	28.009717	MN706298	MN706358
	BIt1109Ps18	B.pseudobassiana	Coleoptera, Curculionidae, Scolytinae, Ips typographus	Pskov Oblast, Gdovsky District	pT1B1.1	2018	58.979183	28.009717	MN706291	MN706351
	BIt1102Ps18	B.pseudobassiana	Coleoptera, Curculionidae, Scolytinae, Ips typographus	Pskov Oblast, Gdovsky District	pT2B1.1	2018	58.979183	28.009717	MN706273	MN706333
	BIt1103Ps18	B.pseudobassiana	Coleoptera, Curculionidae, Scolytinae, Ips typographus	Pskov Oblast, Gdovsky District	pT2B1.1	2018	58.979183	28.009717	MN706274	MN706334
	BIt1114Ps18	B.pseudobassiana	Coleoptera, Curculionidae, Scolytinae, Ips typographus	Pskov Oblast, Gdovsky District	pT2B1.1	2018	58.979183	28.009717	MN706270	MN706330
	BIt1106Ps18	B.pseudobassiana	Coleoptera, Curculionidae, Scolytinae, Ips typographus	Pskov Oblast, Gdovsky District	pT2B1.3	2018	58.979183	28.009717	MN706275	MN706335
13	BIt84Lo17	B.pseudobassiana	Coleoptera, Curculionidae, Scolytinae, Ips typographus	Leningrad Oblast, Vyborgsky District	pT1B1.1	2017	60.854850	28.899919	MN706297	MN706357
14	BIt451Vg19	B. pseudobassiana	Coleoptera, Curculionidae, Scolytinae, Ips typographus	Vologda Oblast, Verkhovazhsky District	pT1B1.1	2019	60.6266389	41.7687778	MW988568	MW962177
	BIt4518Vg19	B. pseudobassiana	Coleoptera, Curculionidae, Scolytinae, Ips typographus	Vologda Oblast, Verkhovazhsky District	pT1B1.1	2019	60.6266389	41.7687778	MW988572	MW962181
	BIt4511Vg19	B. pseudobassiana	Coleoptera, Curculionidae, Scolytinae, Ips typographus	Vologda Oblast, Verkhovazhsky District	pT1B2.1	2019	60.6266389	41.7687778	MW988569	MW962178
	BIt4517Vg19	B. pseudobassiana	Coleoptera, Curculionidae, Scolytinae, Ips typographus	Vologda Oblast, Verkhovazhsky District	pT1B2.2	2019	60.6266389	41.7687778	MW988571	MW962180
	BIt459Vg19	B. pseudobassiana	Coleoptera, Curculionidae, Scolytinae, Ips typographus	Vologda Oblast, Verkhovazhsky District	pT2B1.1	2019	60.6266389	41.7687778	MW988577	MW962186
	BIt455Vg19	B. pseudobassiana	Coleoptera, Curculionidae, Scolytinae, Ips typographus	Vologda Oblast, Verkhovazhsky District	pT2B1.2	2019	60.6266389	41.7687778	MW988575	MW962184
	BIt453Vg19	B. pseudobassiana	Coleoptera, Curculionidae, Scolytinae, Ips typographus	Vologda Oblast, Verkhovazhsky District	pT2B4	2019	60.6266389	41.7687778	MW988573	MW962182
	BIt458Vg19	B. pseudobassiana	Coleoptera, Curculionidae, Scolytinae, Ips typographus	Vologda Oblast, Verkhovazhsky District	pT3B3	2019	60.6266389	41.7687778	MW988576	MW962185
	BIt4514Vg19	B. pseudobassiana	Coleoptera, Curculionidae, Scolytinae, Ips typographus	Vologda Oblast, Verkhovazhsky District	pT3B3	2019	60.6266389	41.7687778	MW988570	MW962179
	BIt454Vg19	B. pseudobassiana	Coleoptera, Curculionidae, Scolytinae, Ips typographus	Vologda Oblast, Verkhovazhsky District	pT3B5	2019	60.6266389	41.7687778	MW988574	MW962183
15	BFo441Ak19	B. pseudobassiana	Hymenoptera, Formicidae	Arkhangelsk Oblast, Velsky District	pT2B1.2	2019	60.9498611	42.0736667	MW988567	MW962176
16	BIt72KR17	B.pseudobassiana	Coleoptera, Curculionidae, Scolytinae, Ips typographus	Republic of Karelia, Pudozhsky District	pT1B1.1	2017	61.51745	36.506933	MN706280	MN706340
	BCo73KR17	B.pseudobassiana	Coleoptera (larva)	Republic of Karelia, Pudozhsky District	pT2B1.1	2017	61.51745	36.506933	MN706264	MN706324
17	BIt612KR17	B.pseudobassiana	Coleoptera, Curculionidae, Scolytinae, Ips typographus	Republic of Karelia, Pudozhsky District	pT1B1.1	2017	61.723317	36.420483	MN706282	MN706342
	BIt613KR17	B.pseudobassiana	Coleoptera, Curculionidae, Scolytinae, Ips typographus	Republic of Karelia, Pudozhsky District	pT1B1.1	2017	61.723317	36.420483	MN706284	MN706344
	BIt611KR17	B.pseudobassiana	Coleoptera, Curculionidae, Scolytinae, Ips typographus	Republic of Karelia, Pudozhsky District	pT1B1.2	2017	61.723317	36.420483	MN706281	MN706341
	BIt62KR17	B.pseudobassiana	Coleoptera, Curculionidae, Scolytinae, Ips typographus	Republic of Karelia, Pudozhsky District	pT2B1.1	2017	61.723317	36.420483	MN706266	MN706326
	BIt68KR17	B.pseudobassiana	Coleoptera, Curculionidae, Scolytinae, Ips typographus	Republic of Karelia, Pudozhsky District	pT2B1.1	2017	61.723317	36.420483	MN706265	MN706325
	BIt69KR17	B.pseudobassiana	Coleoptera, Curculionidae, Scolytinae, Ips typographus	Republic of Karelia, Pudozhsky District	pT3B3	2017	61.723317	36.420483	MN706299	MN706359
18	BHe301KR19	B. bassiana	Hemiptera, Heteroptera	Republic of Karelia, Pudozhsky District	bT1B1	2019	61.8123611	37.2346389	MW988547	MW962156
19	BCo3110Ak19	B. pseudobassiana	Coleoptera	Arkhangelsk Oblast, Kargopolsky District	pT1B1.1	2019	61.8333889	39.1068056	MW988548	MW962157
	BIn3112Ak19	B. pseudobassiana	Insecta	Arkhangelsk Oblast, Kargopolsky District	pT1B1.1	2019	61.8333889	39.1068056	MW988549	MW962158
	BCo317Ak19	B. pseudobassiana	Coleoptera	Arkhangelsk Oblast, Kargopolsky District	pT2B4	2019	61.8333889	39.1068056	MW988550	MW962159
	BCo319Ak19	B. pseudobassiana	Coleoptera	Arkhangelsk Oblast, Kargopolsky District	pT2B4	2019	61.8333889	39.1068056	MW988551	MW962160
20	BIt111KR17	B.pseudobassiana	Coleoptera, Curculionidae, Scolytinae, Ips typographus	Republic of Karelia, Kondopozhsky District, Gomselga	pT1B1.1	2017	62.0648	33.985033	MN706276	MN706336
	BIt120KR17	B.pseudobassiana	Coleoptera, Curculionidae, Scolytinae, Ips typographus	Republic of Karelia, Kondopozhsky District, Gomselga	pT1B1.1	2017	62.0648	33.985033	MN706279	MN706339
	BIt14KR17	B.pseudobassiana	Coleoptera, Curculionidae, Scolytinae, Ips typographus	Republic of Karelia, Kondopozhsky District, Gomselga	pT1B1.1	2017	62.0648	33.985033	MN706278	MN706338
	BIt17KR17	B.pseudobassiana	Coleoptera, Curculionidae, Scolytinae, Ips typographus	Republic of Karelia, Kondopozhsky District, Gomselga	pT1B1.1	2017	62.0648	33.985033	MN706277	MN706337
	BSc27KR17	B.pseudobassiana	Coleoptera, Curculionidae, Scolytinae	Republic of Karelia, Kondopozhsky District, Gomselga	pT1B2.1	2017	62.0648	33.985033	MN706285	MN706345
	BIt115KR17	B.pseudobassiana	Coleoptera, Curculionidae, Scolytinae, Ips typographus	Republic of Karelia, Kondopozhsky District, Gomselga	pT1B6	2017	62.0648	33.985033	MN706290	MN706350
	BIt122KR17	B.pseudobassiana	Coleoptera, Curculionidae, Scolytinae, Ips typographus	Republic of Karelia, Kondopozhsky District, Gomselga	pT2B1.1	2017	62.0648	33.985033	MN706263	MN706323
	BSc22KR17	B.pseudobassiana	Coleoptera, Curculionidae, Scolytinae	Republic of Karelia, Kondopozhsky District, Gomselga	pT2B1.1	2017	62.0648	33.985033	MN706267	MN706327
21	BIt51KR17	B.pseudobassiana	Coleoptera, Curculionidae, Scolytinae, Ips typographus	Republic of Karelia, Pudozhsky District	pT3B3	2017	62.078017	35.962217	MN706302	MN706362
	BSc520KR17	B.pseudobassiana	Coleoptera, Curculionidae, Scolytinae	Republic of Karelia, Pudozhsky District	pT3B5	2017	62.078017	35.962217	MN706301	MN706361
	BSc521KR17	B.pseudobassiana	Coleoptera, Curculionidae, Scolytinae	Republic of Karelia, Pudozhsky District	pT3B5	2017	62.078017	35.962217	MN706300	MN706360
22	BSc41KR17	B.pseudobassiana	Coleoptera, Curculionidae, Scolytinae	Republic of Karelia, Pudozhsky District	pT1B2.1	2017	62.480917	35.889417	MN706289	MN706349
	BCo47KR17	B.pseudobassiana	Coleoptera	Republic of Karelia, Pudozhsky District	pT1B2.1	2017	62.480917	35.889417	MN706283	MN706343
	BCo43KR17	B.pseudobassiana	Coleoptera, Cerambycidae	Republic of Karelia, Pudozhsky District	pT2B1.1	2017	62.480917	35.889417	MN706269	MN706329
	BIt45KR17	B.pseudobassiana	Coleoptera, Curculionidae, Scolytinae, Ips typographus	Republic of Karelia, Pudozhsky District	pT3B3	2017	62.480917	35.889417	MN706303	MN706363
	BIt452KR17	B.pseudobassiana	Coleoptera, Curculionidae, Scolytinae, Ips typographus	Republic of Karelia, Pudozhsky District	pT3B3	2017	62.480917	35.889417	MN706304	MN706364
23	BIt81KR17	B.caledonica	Coleoptera, Curculionidae, Scolytinae, Ips typographus	Republic of Karelia, Medvezhyegorsky District	cT1B2	2017	62.783433	34.541233	MN706308	MN706368
	BSc310KR17	B.pseudobassiana	Coleoptera, Curculionidae, Scolytinae	Republic of Karelia, Medvezhyegorsky District	pT1B2.2	2017	62.783433	34.541233	MN706288	MN706348
	BSc31KR17	B.pseudobassiana	Coleoptera, Curculionidae, Scolytinae	Republic of Karelia, Medvezhyegorsky District	pT1B2.2	2017	62.783433	34.541233	MN706286	MN706346
	BSc38KR17	B.pseudobassiana	Coleoptera, Curculionidae, Scolytinae	Republic of Karelia, Medvezhyegorsky District	pT1B2.2	2017	62.783433	34.541233	MN706287	MN706347
	BSc36KR17	B.pseudobassiana	Coleoptera, Curculionidae, Scolytinae	Republic of Karelia, Medvezhyegorsky District	pT2B1.1	2017	62.783433	34.541233	MN706268	MN706328
24	BCo321Ak19	B. pseudobassiana	Coleoptera	Arkhangelsk Oblast, Plesetsky District	pT1B1.1	2019	62.4622222	39.9834444	MW988552	MW962161
	BSt323Ak19	B. pseudobassiana	Coleoptera, Staphylinidae	Arkhangelsk Oblast, Plesetsky District	pT1B1.1	2019	62.4622222	39.9834444	MW988553	MW962162
25	BIn331Ak19	B. pseudobassiana	Insecta	Arkhangelsk Oblast, Plesetsky District	pT1B6	2019	62.5535833	40.0491944	MW988554	MW962163
	BSc334Ak19	B. pseudobassiana	Coleoptera, Curculionidae, Scolytinae	Arkhangelsk Oblast, Plesetsky District	pT2B1.1	2019	62.5535833	40.0491944	MW988555	MW962164
26	BSc353Ak19	B. bassiana	Coleoptera, Curculionidae, Scolytinae	Arkhangelsk Oblast, Plesetsky District	bT4B4	2019	63.2920556	40.5489444	MW988557	MW962166
	BD352Ak19	B. pseudobassiana	Diptera, Cyclorrhapha	Arkhangelsk Oblast, Plesetsky District	pT2B1.1	2019	63.2920556	40.5489444	MW988556	MW962165
	BSc355Ak19	B. pseudobassiana	Coleoptera, Curculionidae, Scolytinae	Arkhangelsk Oblast, Plesetsky District	pT2B1.2	2019	63.2920556	40.5489444	MW988559	MW962168
	BSc354Ak19	B. pseudobassiana	Coleoptera, Curculionidae, Scolytinae	Arkhangelsk Oblast, Plesetsky District	pT3B3	2019	63.2920556	40.5489444	MW988558	MW962167
27	BCu362Ak19	B. pseudobassiana	Coleoptera, Curculionidae	Arkhangelsk Oblast, Plesetsky District	pT2B1.2	2019	63.4098889	40.4195278	MW988560	MW962169
28	BIn3710Ak19	B. pseudobassiana	Insecta (larva)	Arkhangelsk Oblast, Kholmogorsky District	pT1B2.1	2019	63.7319722	40.9275000	MW988561	MW962170
29	BSc383Ak19	B. pseudobassiana	Coleoptera, Curculionidae, Scolytinae	Arkhangelsk Oblast, Kholmogorsky District	pT1B1.1	2019	63.7120833	41.1556667	MW988563	MW962172
	BIn382Ak19	B. pseudobassiana	Insecta	Arkhangelsk Oblast, Kholmogorsky District	pT1B2.2	2019	63.7120833	41.1556667	MW988562	MW962171
30	BIt401Ak19	B. pseudobassiana	Coleoptera, Curculionidae, Scolytinae, Ips typographus	Arkhangelsk Oblast, Kholmogorsky District	pT2B1.2	2019	64.2101111	41.2469722	MW988565	MW962174
	BE402Ak19	B. pseudobassiana	Coleoptera, Elateridae	Arkhangelsk Oblast, Kholmogorsky District	pT1B2.1	2019	64.2101111	41.2469722	MW988566	MW962175
31	BIt393Ak19	B. pseudobassiana	Coleoptera, Curculionidae, Scolytinae, Ips typographus	Arkhangelsk Oblast, Primorsky District	pT2B1.2	2019	64.3161944	40.8005278	MW988564	MW962173
