# Supplementary material for: Distribution and Diversity of Beauveria in Boreal Forests of Northern European Russia
Source: Microorganisms. 2021 Jun 29;9(7):1409. doi: 10.3390/microorganisms9071409 (PMC8308049; doi:10.3390/microorganisms9071409)
Supplement: Supplementary file 1 [file microorganisms-09-01409-s001.zip › Table_S2_Accompanying_species.xlsx]

## Sheet: S2_accompanying species
Table S2. Accompanying species from other genera registered during survey
№ location	species	host	administrative location	year	Lat	Lon	number of specimens
5	Cordyceps militaris	Lepidoptera (pupa)	Novgorod Oblast, Okulovsky District, Valdaysky National Park	2018	57.742183	32.993883	10
5	Cordyceps bifusispora	Lepidoptera (pupa)	Novgorod Oblast, Okulovsky District, Valdaysky National Park	2018	57.742183	32.993883	2
8	Metarhizium	Coleoptera, Elateridae	Vologda Oblast, Cherepovetsky District, Darwin Nature Reserve	2018	58.527467	37.557617	1
10	Isaria cf. farinosa	Coleoptera, Scolytinae, Ips typographus	Leningrad Oblast, Luzhsky District	2017	58.634142	29.848023	1
14	Tolypocladium sp.	Coleoptera, Scolytinae, Ips typographus	Vologda Oblast, Verkhovazhsky District	2019	60.6266389	41.7687778	1
16	Lecanicillium cf. attenuatum	Coleoptera, Scolytinae, Ips typographus	Republic of Karelia, Pudozhsky District	2017	61.51745	36.506933	1
19	Lecanicillium cf. attenuatum	Insecta	Arkhangelsk Oblast, Kargopolsky District	2019	61.8333889	39.1068056	1
19	Isaria cf. farinosa	Lepidoptera (pupa)	Arkhangelsk Oblast, Kargopolsky District	2019	61.8333889	39.1068056	2
19	Cordyceps militaris	Lepidoptera (pupa)	Arkhangelsk Oblast, Kargopolsky District	2019	61.8333889	39.1068056	4
20	Lecanicillium cf. attenuatum	Coleoptera, Scolytinae	Republic of Karelia, Kondopozhsky District, Gomselga	2017	62.0648	33.985033	2
20	Isaria cf. farinosa	Coleoptera, Scolytinae, Ips typographus	Republic of Karelia, Kondopozhsky District, Gomselga	2017	62.0648	33.985033	1
21	Lecanicillium cf. attenuatum	Coleoptera, Scolytinae, Ips typographus	Republic of Karelia, Pudozhsky District	2017	62.078017	35.962217	1
24	Cordyceps militaris	Lepidoptera (pupa)	Arkhangelsk Oblast, Plesetsky District	2019	62.4622222	39.9834444	11
25	Lecanicillium cf. attenuatum	Coleoptera	Arkhangelsk Oblast, Plesetsky District	2019	62.5535833	40.0491944	1
26	Isaria cf. farinosa	Lepidoptera (pupa)	Arkhangelsk Oblast, Plesetsky District	2019	63.2920556	40.5489444	1
27	Isaria cf. farinosa	Hymenoptera, Braconidae	Arkhangelsk Oblast, Plesetsky District	2019	63.4098889	40.4195278	1
27	Cordyceps militaris	Lepidoptera (pupa)	Arkhangelsk Oblast, Plesetsky District	2019	63.4098889	40.4195278	1
29	Ophiocordyceps entomorrhiza	Coleoptera, Carabidae (larva)	Arkhangelsk Oblast, Kholmogorsky District	2019	63.7120833	41.1556667	1
