# Supplementary material for: Distribution and Diversity of Beauveria in Boreal Forests of Northern European Russia
Source: Microorganisms. 2021 Jun 29;9(7):1409. doi: 10.3390/microorganisms9071409 (PMC8308049; doi:10.3390/microorganisms9071409)
Supplement: Supplementary file 1 [file microorganisms-09-01409-s001.zip › Table_S4_Spatial autocorrelation.xlsx]

## Sheet: all haplotypes
Results of Spatial Structure Analysis for all B. pseudobassiana haplotypes
Genetic Distance	GD
Geographic Distance	GGD
Data Title
No. Samples	74
Even Distance Classes (Size = 50)
No. Dist. Classes	18
No. Permutations	9999
No. Bootstraps	10000
n	230	141	211	164	136	182	329	189	238	110	69	258	30	75	59	142	63	46
Distance Class (End Point)	50	100	150	200	250	300	350	400	450	500	550	600	650	700	750	800	850	900
r	0.149232	-0.0236623	-0.0325636	-0.159833	-0.0339162	0.014212	0.0332396	0.0558377	-0.0117886	0.182495	-0.192333	-0.0695212	0.326239	-0.0051739	0.0696007	-0.0911773	0.118123	-0.0830576
U	0.0820032	0.0905694	0.0704031	0.0800541	0.0811885	0.075319	0.0530579	0.07307	0.0610474	0.0952413	0.132875	0.0547638	0.211993	0.122917	0.143851	0.081742	0.140873	0.163013
L	-0.0563213	-0.0902217	-0.0722122	-0.0791191	-0.0842117	-0.0776785	-0.0574632	-0.0753001	-0.0688183	-0.102716	-0.126149	-0.0685767	-0.187147	-0.124825	-0.140388	-0.0950091	-0.143048	-0.162552
P(r-rand >= r-data)	0.0012	0.7239	0.8569	0.9997	0.8387	0.3484	0.0908	0.0574	0.6949	0.0022	0.9968	0.9758	0.0044	0.5315	0.1372	0.9723	0.0408	0.8853
P(r-rand <= r-data)	0.9989	0.2762	0.1432	0.0004	0.1614	0.6517	0.9093	0.9427	0.3052	0.9979	0.0033	0.0243	0.9957	0.4686	0.8629	0.0278	0.9593	0.1148
Correction	0.0136986	0.0136986	0.0136986	0.0136986	0.0136986	0.0136986	0.0136986	0.0136986	0.0136986	0.0136986	0.0136986	0.0136986	0.0136986	0.0136986	0.0136986	0.0136986	0.0136986	0.0136986
r uc	0.135533	-0.0373609	-0.0462623	-0.173531	-0.0476148	0.000513395	0.0195409	0.042139	-0.0254872	0.168796	-0.206032	-0.0832198	0.312541	-0.0188725	0.0559021	-0.104876	0.104424	-0.0967562
U uc	0.0683045	0.0768707	0.0567045	0.0663554	0.0674899	0.0616203	0.0393593	0.0593713	0.0473488	0.0815426	0.119177	0.0410652	0.198294	0.109218	0.130152	0.0680433	0.127174	0.149314
L uc	-0.0700199	-0.10392	-0.0859108	-0.0928177	-0.0979103	-0.0913771	-0.0711618	-0.0889987	-0.0825169	-0.116414	-0.139847	-0.0822754	-0.200846	-0.138523	-0.154086	-0.108708	-0.156746	-0.17625
Mean Bootstrap r	0.149264	-0.0230652	-0.0317818	-0.160301	-0.0337883	0.0132234	0.0333234	0.0552364	-0.011422	0.185907	-0.191635	-0.0696111	0.31872	-0.00459771	0.0678075	-0.0892907	0.116332	-0.082745
Ur error	0.0835156	0.100896	0.0634937	0.0544051	0.0786426	0.0820818	0.0634388	0.0848861	0.0688578	0.134634	0.0889102	0.0710617	0.219811	0.0969684	0.154307	0.0808873	0.195914	0.135476
Lr error	0.0809999	0.0955987	0.0612247	0.0524787	0.0681605	0.0850253	0.0624837	0.084864	0.0668852	0.115099	0.0807435	0.0665667	0.24985	0.0853415	0.153639	0.0714689	0.184255	0.11942
Ur	0.232748	0.0772336	0.0309301	-0.105428	0.0447265	0.0962939	0.0966783	0.140724	0.0570692	0.317129	-0.103423	0.00154046	0.546051	0.0917945	0.223907	-0.01029	0.314037	0.052418
Lr	0.068232	-0.119261	-0.0937883	-0.212311	-0.102077	-0.0708133	-0.0292442	-0.0290264	-0.0786738	0.0673959	-0.273077	-0.136088	0.076389	-0.0905154	-0.0840378	-0.162646	-0.0661321	-0.202478
Intercept	93.157
r, U and L values are adjusted by the correction factor. Uncorrected values are shown as r uc, U uc, L uc. Bootstrap mean, Ur, Lr are also adjusted by the correction factor.
Upper (Ur error) and lower (Lr error) error bars bound the 95% confidence interval about r as determined by bootstrap resampling.
Upper (U) and lower (L) confidence limits bound the 95% confidence interval about the null hypothesis of No spatial structure for the combined data set as determined by permutation.

## Sheet: all haplotypes - T1B1.1, T2B1.1
Results of Spatial Structure Analysis for all B. pseudobassiana haplotypes except T1B1.1 and T2B1.1 (the most abundant) haplotypes in dfc zone
Genetic Distance	GD_minus_cosmpolol_at_dfc
Geographic Distance	GGD minus_cosmpolol_at_dfc
Data Title
No. Samples	50
Even Distance Classes (Size = 50)
No. Dist. Classes	18
No. Permutations	9999
No. Bootstraps	10000
n	110	46	49	75	31	60	147	94	84	32	27	174	20	42	38	83	50	34
Distance Class (End Point)	50	100	150	200	250	300	350	400	450	500	550	600	650	700	750	800	850	900
r	0.357136	0.12735	0.121226	-0.228859	0.193589	0.086984	0.0307198	0.0217126	-0.0670286	-0.306022	-0.247963	-0.157949	0.273037	-0.0372939	0.133982	-0.245309	0.241893	-0.105692
U	0.10778	0.148384	0.144441	0.111529	0.173527	0.12536	0.0732905	0.0943242	0.100642	0.179705	0.190444	0.0580662	0.234542	0.151629	0.154348	0.0967367	0.130396	0.155465
L	-0.0750691	-0.148698	-0.145811	-0.106757	-0.156616	-0.127102	-0.079495	-0.105533	-0.104054	-0.17417	-0.189009	-0.0742781	-0.22251	-0.149608	-0.162759	-0.112127	-0.141197	-0.163955
P(r-rand >= r-data)	0.0001	0.0428	0.0468	0.9997	0.0167	0.0775	0.1982	0.33	0.9087	0.9993	0.995	0.9994	0.0143	0.7015	0.0395	0.9993	0.0014	0.9175
P(r-rand <= r-data)	1	0.9573	0.9533	0.0004	0.9834	0.9226	0.8019	0.6701	0.0914	0.0008	0.0051	0.0007	0.9858	0.2986	0.9606	0.0008	0.9987	0.0826
Correction	0.0204082	0.0204082	0.0204082	0.0204082	0.0204082	0.0204082	0.0204082	0.0204082	0.0204082	0.0204082	0.0204082	0.0204082	0.0204082	0.0204082	0.0204082	0.0204082	0.0204082	0.0204082
r uc	0.336728	0.106942	0.100818	-0.249267	0.173181	0.0665758	0.0103117	0.00130444	-0.0874368	-0.32643	-0.268371	-0.178357	0.252628	-0.0577021	0.113574	-0.265717	0.221485	-0.1261
U uc	0.0873714	0.127976	0.124032	0.0911207	0.153119	0.104952	0.0528823	0.0739161	0.0802337	0.159297	0.170036	0.037658	0.214134	0.131221	0.13394	0.0763285	0.109988	0.135057
L uc	-0.0954772	-0.169106	-0.166219	-0.127165	-0.177024	-0.14751	-0.0999032	-0.125941	-0.124462	-0.194578	-0.209418	-0.0946863	-0.242919	-0.170016	-0.183167	-0.132535	-0.161606	-0.184363
Mean Bootstrap r	0.357525	0.125392	0.12226	-0.228845	0.196109	0.0899558	0.0306285	0.0214393	-0.0677918	-0.308988	-0.24947	-0.158233	0.268212	-0.0360335	0.133846	-0.244687	0.239448	-0.105208
Ur error	0.111945	0.159926	0.11505	0.0718266	0.122141	0.136037	0.0911326	0.114562	0.110009	0.0916645	0.108554	0.0799514	0.238431	0.110063	0.170594	0.0848354	0.200351	0.165067
Lr error	0.108786	0.160019	0.100795	0.064114	0.099125	0.124467	0.0895924	0.109856	0.0996114	0.0943601	0.104688	0.0763252	0.255938	0.0938211	0.174672	0.0729342	0.198124	0.13922
Ur	0.469081	0.287276	0.236276	-0.157033	0.31573	0.223021	0.121852	0.136274	0.0429803	-0.214358	-0.139408	-0.0779976	0.511467	0.0727694	0.304576	-0.160473	0.442244	0.0593751
Lr	0.248351	-0.0326691	0.0204313	-0.292973	0.0944638	-0.0374827	-0.0588726	-0.0881431	-0.16664	-0.400382	-0.352651	-0.234274	0.0170984	-0.131115	-0.0406898	-0.318243	0.0437691	-0.244911
Intercept	167.314
r, U and L values are adjusted by the correction factor. Uncorrected values are shown as r uc, U uc, L uc. Bootstrap mean, Ur, Lr are also adjusted by the correction factor.
Upper (Ur error) and lower (Lr error) error bars bound the 95% confidence interval about r as determined by bootstrap resampling.
Upper (U) and lower (L) confidence limits bound the 95% confidence interval about the null hypothesis of No spatial structure for the combined data set as determined by permutation.
