# Supplementary figures and images for: Distribution and Diversity of Beauveria in Boreal Forests of Northern European Russia
Source: MDPI journal article supplement (doi:10.3390/microorganisms9071409), 2021-06-29

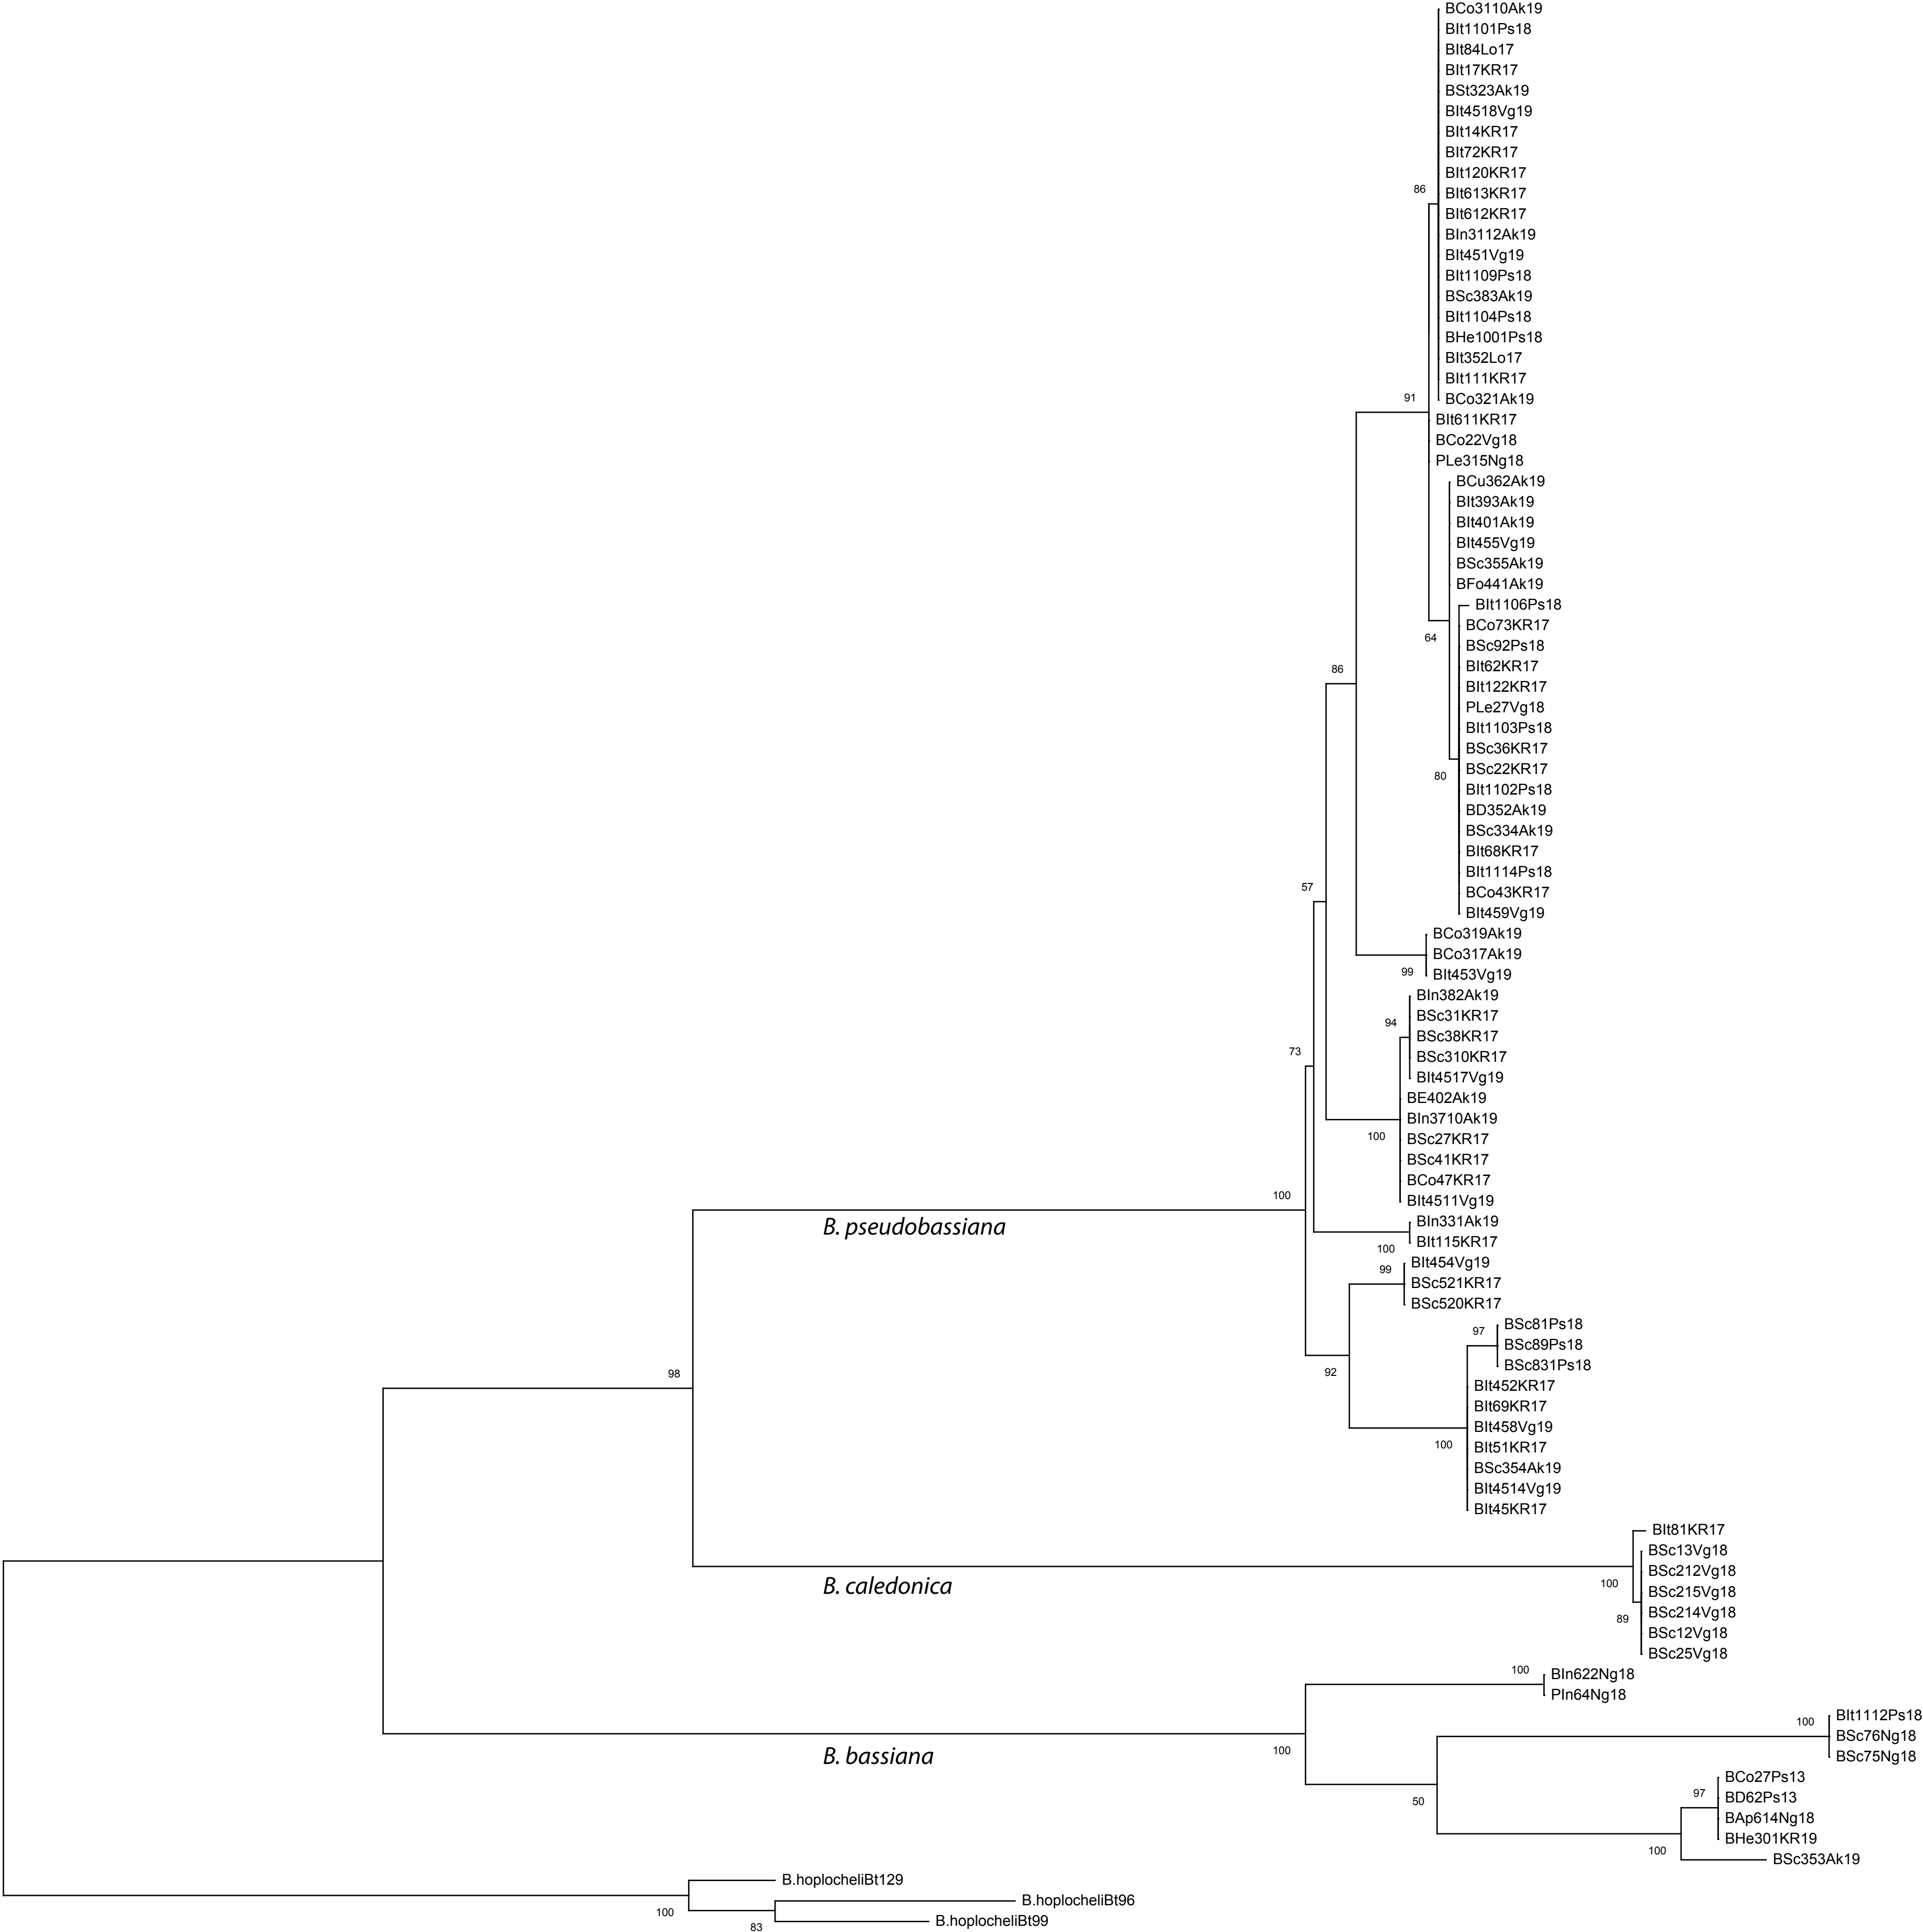

0.020

Supplement: s1 [file s1]
